# Supplementary material for: Accuracy of Two CE-Marked Blood Glucose Monitoring System Based on EN ISO 15197:2015
Source: MDPI journal article supplement (doi:10.3390/diabetology2040021), 2021-11-17
Supplement: s1 [file s1]

## 1<sup>st</sup> Device

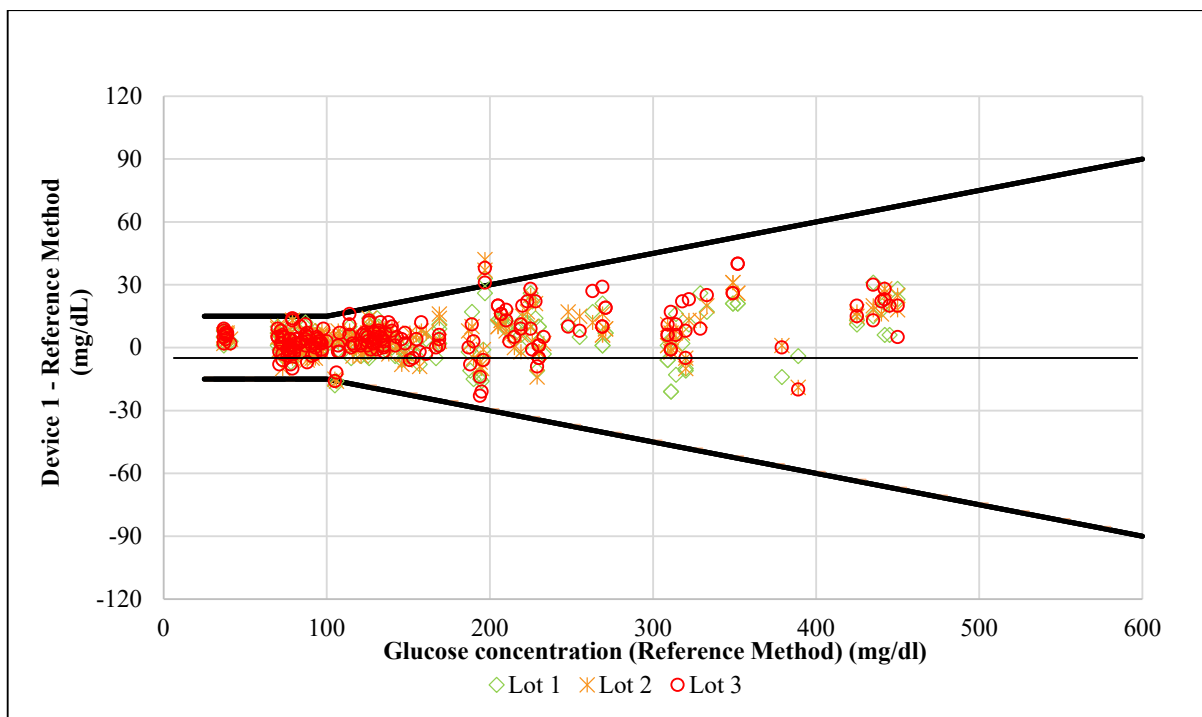

Figure S1 –Absolute differences between Device 1 and Reference Method

## Bland-Altman – Device 1

**Table S1 – Device 1 – Summary of bias analysis (Bland-Altman)**

| n = 200               | Bias<br>[mg/dl]          | 95% Limits of agreement<br>[mg/dl] |
|-----------------------|--------------------------|------------------------------------|
| Reagent system lot 1: | 3.8 (95%CI: 2.57; 5.09)  | -13.89 – 21.56                     |
| Reagent system lot 2: | 4.9 (95%CI: 3.68; 6.18)  | -12.67 – 22.53                     |
| Reagent system lot 3: | 5.87 (95%CI: 4.46; 7.27) | -13.93 – 25.66                     |

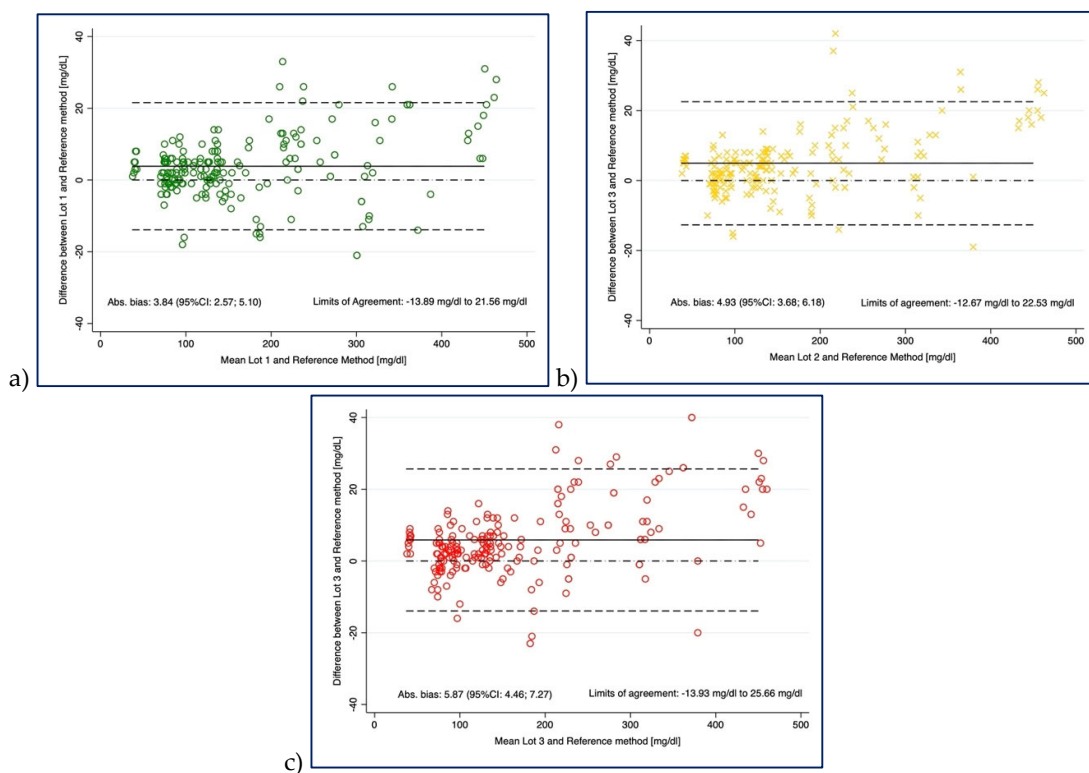

**Figure S2 – Device 1 - Bland-Altman plot for a) Lot 1; b) Lot 2; c) Lot 3**

## Passing Bablok Regression – Device 1

**Table S2 – Device 1 - Summary of regression analysis (Passing and Bablok)**

|                       |                     |
|-----------------------|---------------------|
| n = 200               | Regression          |
| Reagent system lot 1: | $y = -0.21 + 1.03x$ |
| Reagent system lot 2: | $y = -1.04 + 1.04x$ |
| Reagent system lot 3: | $y = -1.61 + 1.04x$ |

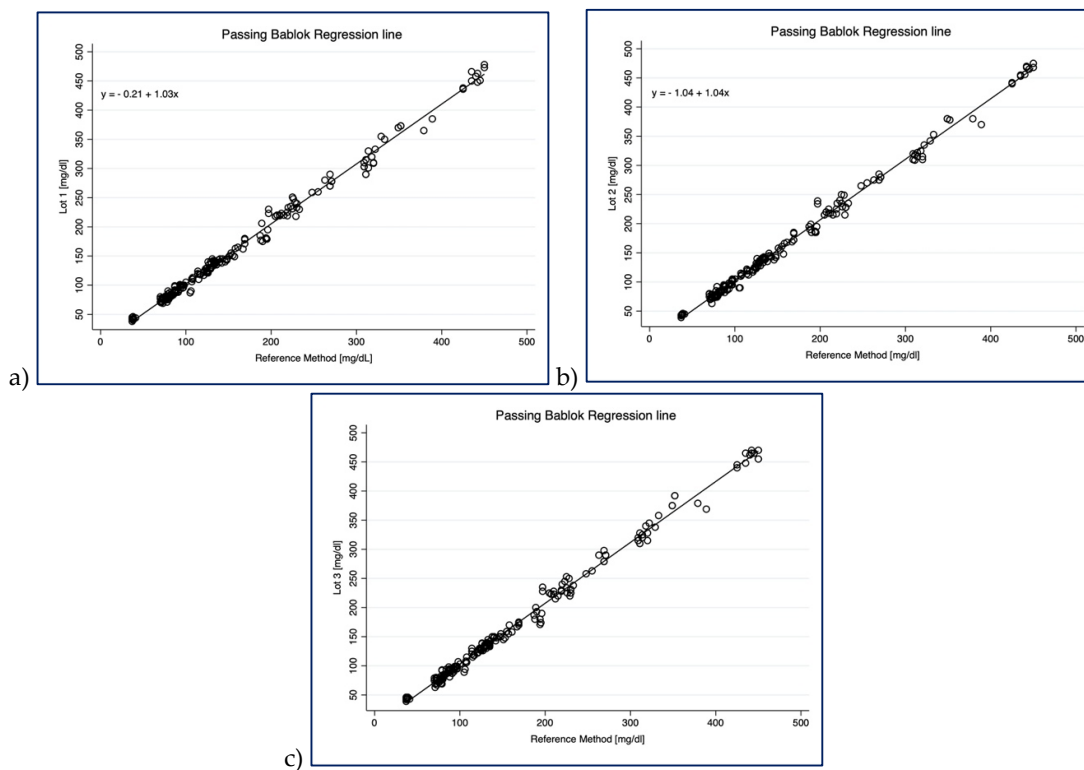

**Figure S3 – Device 1 - Passing Bablok regression for a) Lot 1; b) Lot 2; c) Lot 3**

## System accuracy acceptability - Consensus Error Grid (CEG) – Device 1

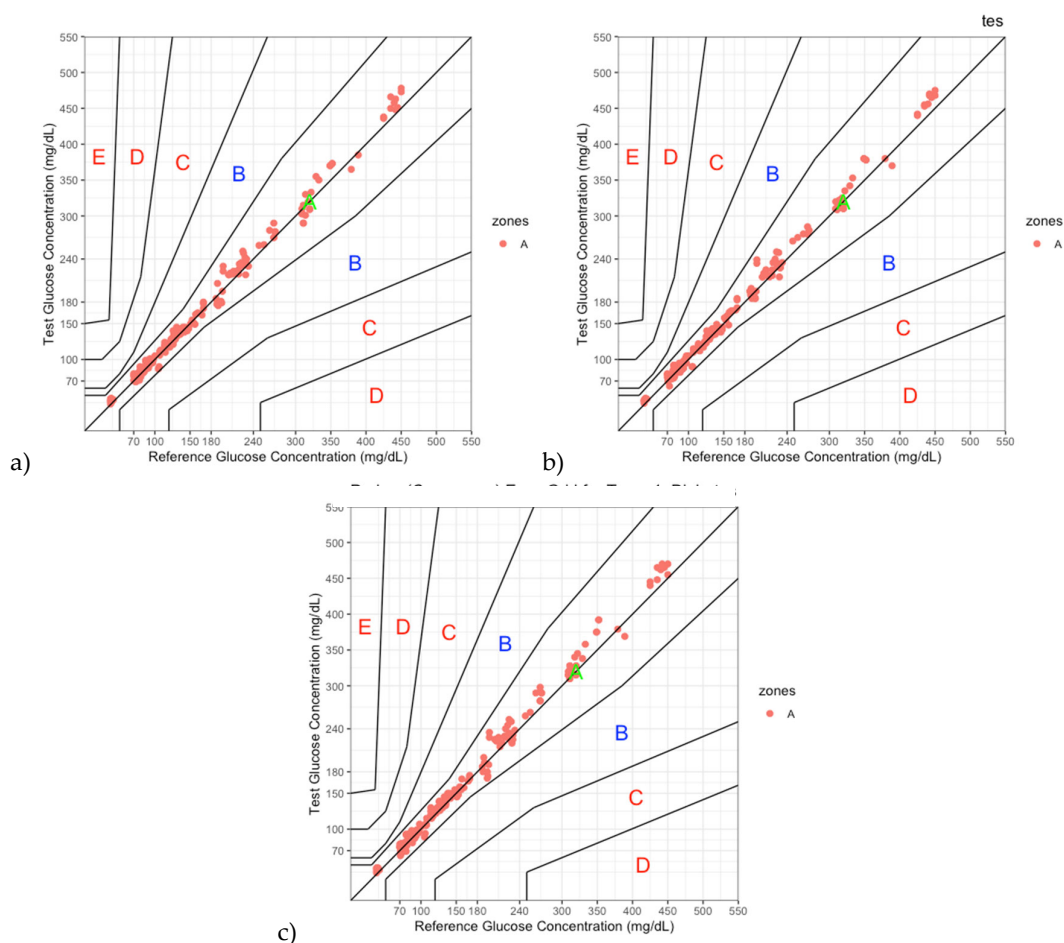

**Figure S4** – Device 1 - Consensus Error Grid a) Lot 1; b) Lot 2; c) Lot 3 - For Lot 1, 200 values are in Zone A; for Lot 2, 199 values are in Zone A and one in Zone B; for Lot 3, 200 values are in Zone A. Therefore, 599 of 600 values (99.8%) are within Zones A and B.

## 2<sup>nd</sup> Device

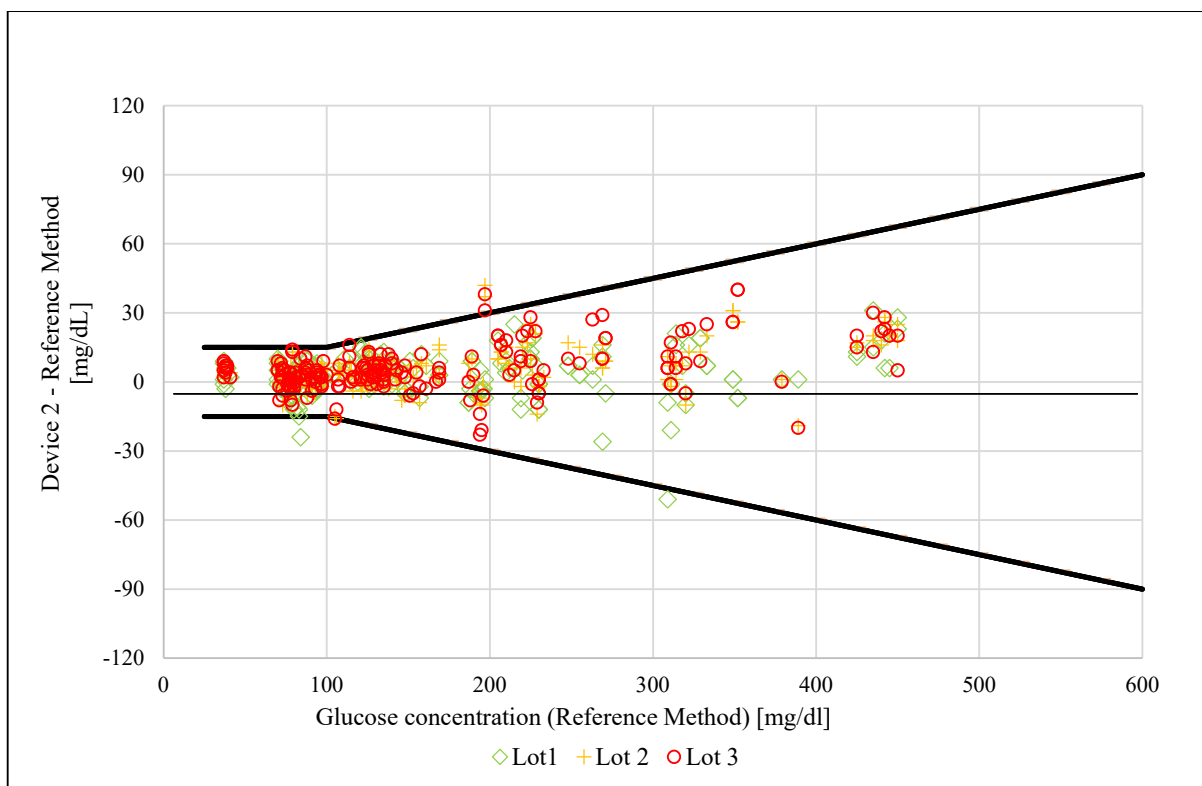

**Figure S5** – Absolute differences between Device 2 and Reference Method

## Bland-Altman – Device 2

Table S3 – Device 2 - Summary of bias analysis (Bland-Altman)

| n = 200               | Bias<br>[mg/dl] | 95% Limits of agreement<br>[mg/dl] |
|-----------------------|-----------------|------------------------------------|
| Reagent system lot 1: | 2.9             | -15.27 – 21.11                     |
| Reagent system lot 2: | 3.0             | -14.86 – 20.76                     |
| Reagent system lot 3: | 4.1             | -13.62 – 21.83                     |

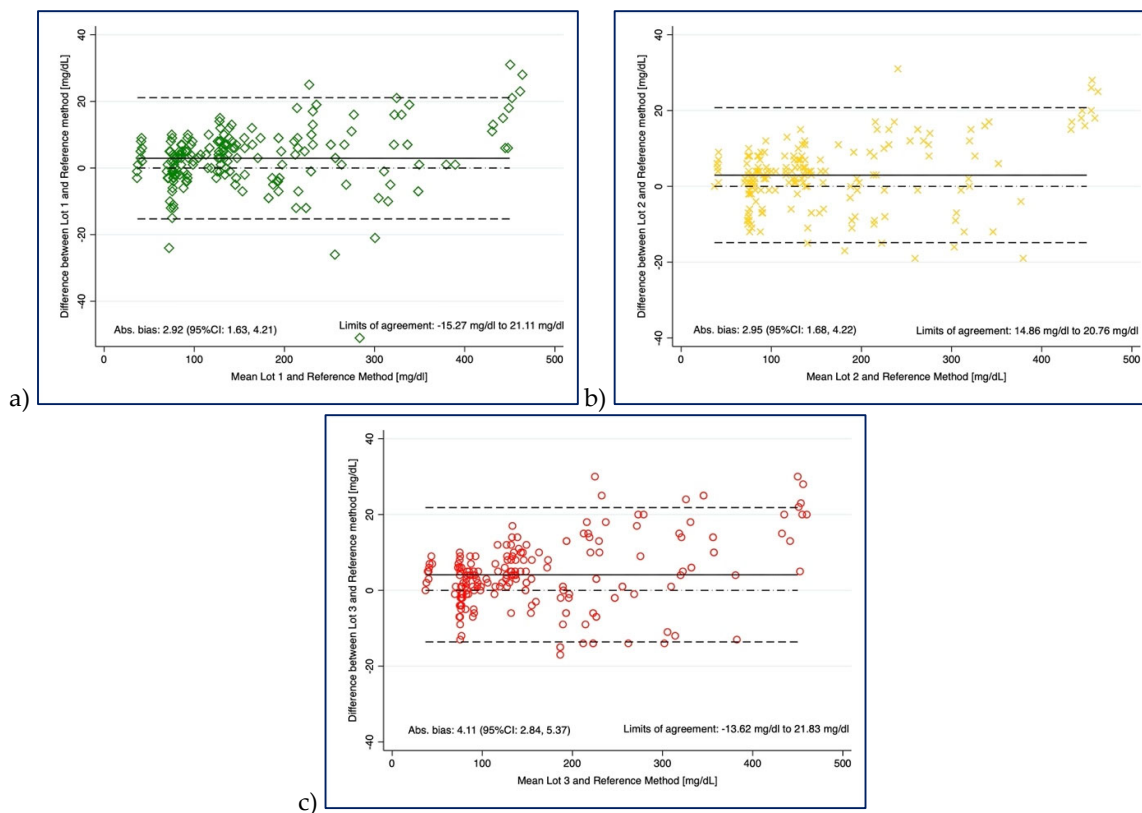

Figure S6 – Device 2 - Bland-Altman plot for a) Lot 1; b) Lot 2; c) Lot 3

## Passing Bablok Regression – Device 2

Table S4 - Device 2 - Summary of regression analysis (Passing and Bablok)

|                       |                     |
|-----------------------|---------------------|
| n = 200               | Regression          |
| Reagent system lot 1: | $y = 0.17 + 1.03x$  |
| Reagent system lot 2: | $y = -0.12 + 1.03x$ |
| Reagent system lot 3: | $y = -0.44 + 1.03x$ |

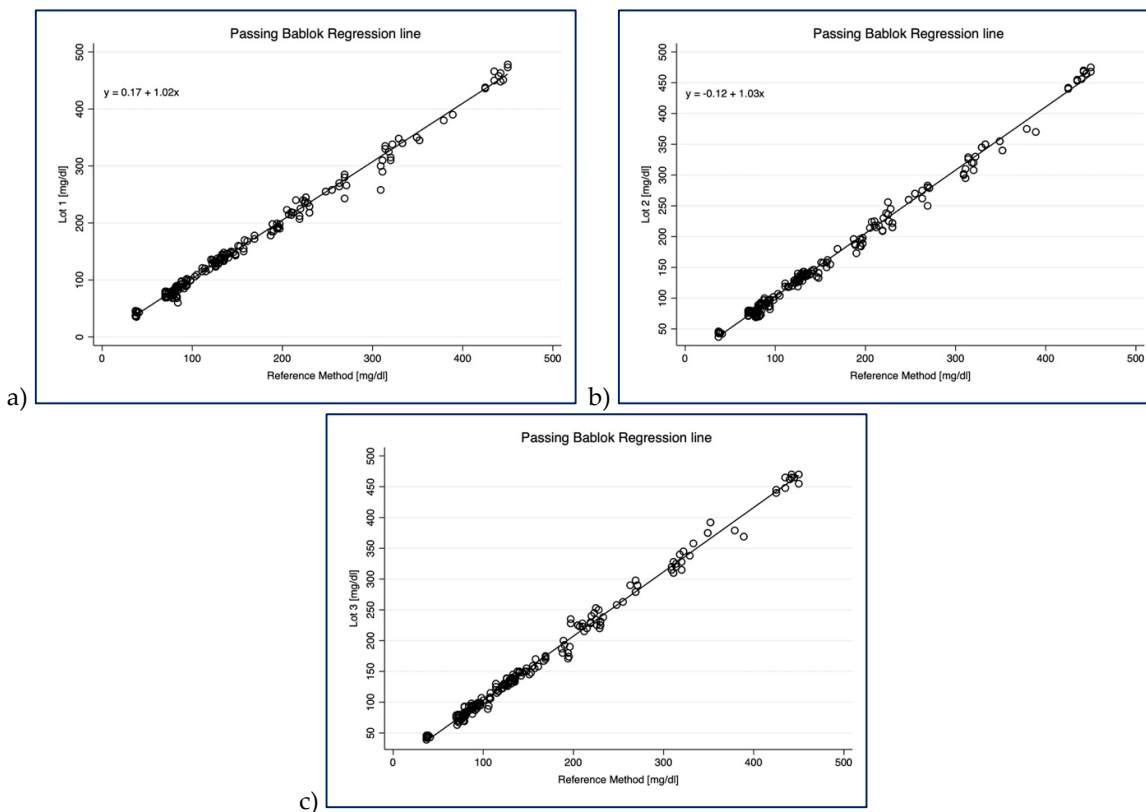

Figure S7 – Device 2 - Passing Bablok Regression for a) Lot 1; b) Lot 2; c) Lot 3.

## System accuracy acceptability - Consensus Error Grid (CEG) – Device 2

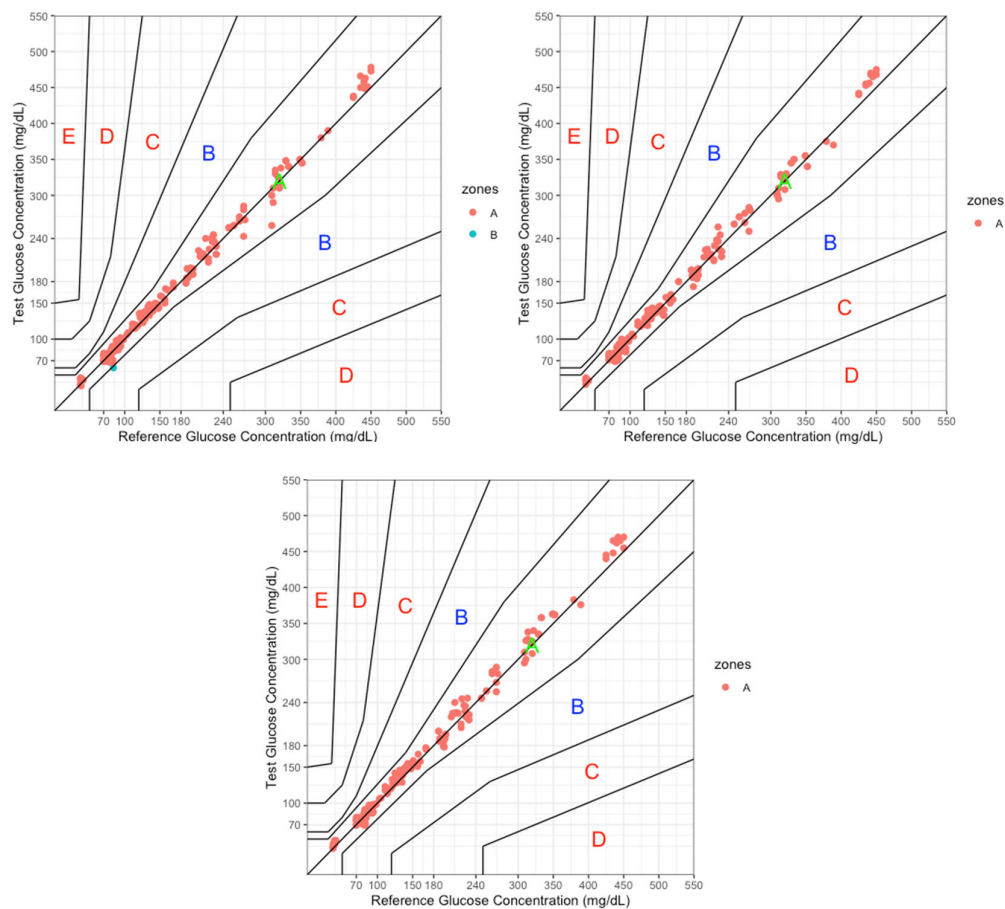

**Figure S8** – Device 2 - Consensus Error Grid for a) Lot 1; b) Lot 2; c) Lot 3. For Lot 1, 198 values are in Zone A and two in Zone B; for Lot 2, 200 values are in Zone A; for Lot 3, 200 values are in Zone A. Therefore, 598 of 600 values (99.7%) are within Zones A and B.
